# Supplementary material
Source: PubMed Central journal article supplement (PMC4372816)
Supplement: NIHMS662895-supplement-1.pdf [file NIHMS662895-supplement-1.pdf]

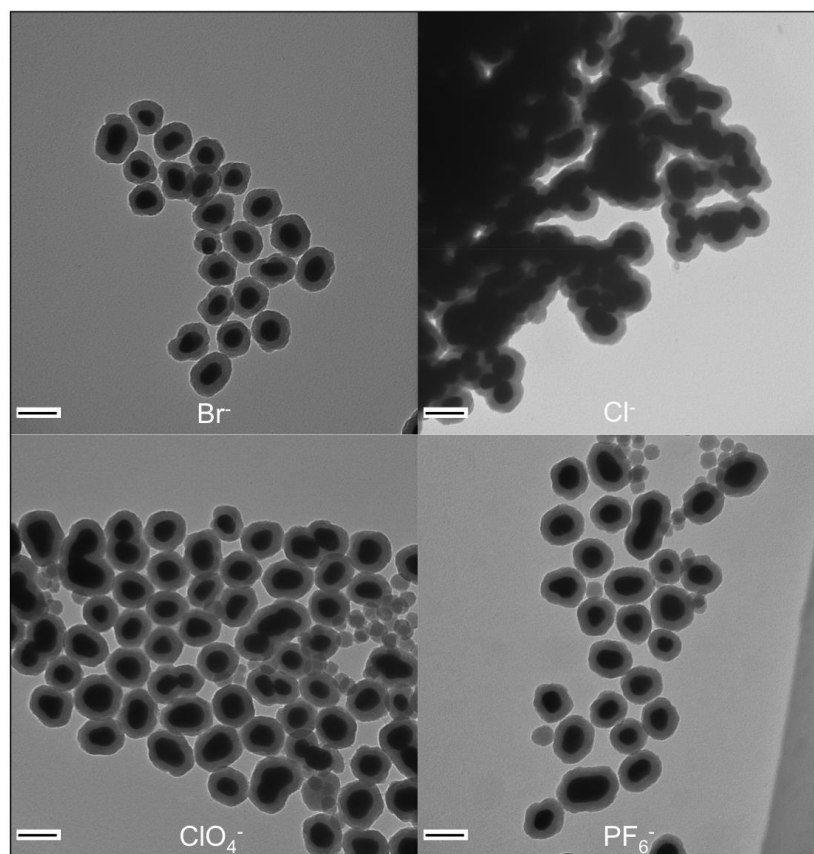

**Supplementary Figure 1. Effect of the counterion on colloidal stability.** Transmission Electron Micrographs of the **1a**-based SERRS-nanoprobes (Scale bar: 100 nm).

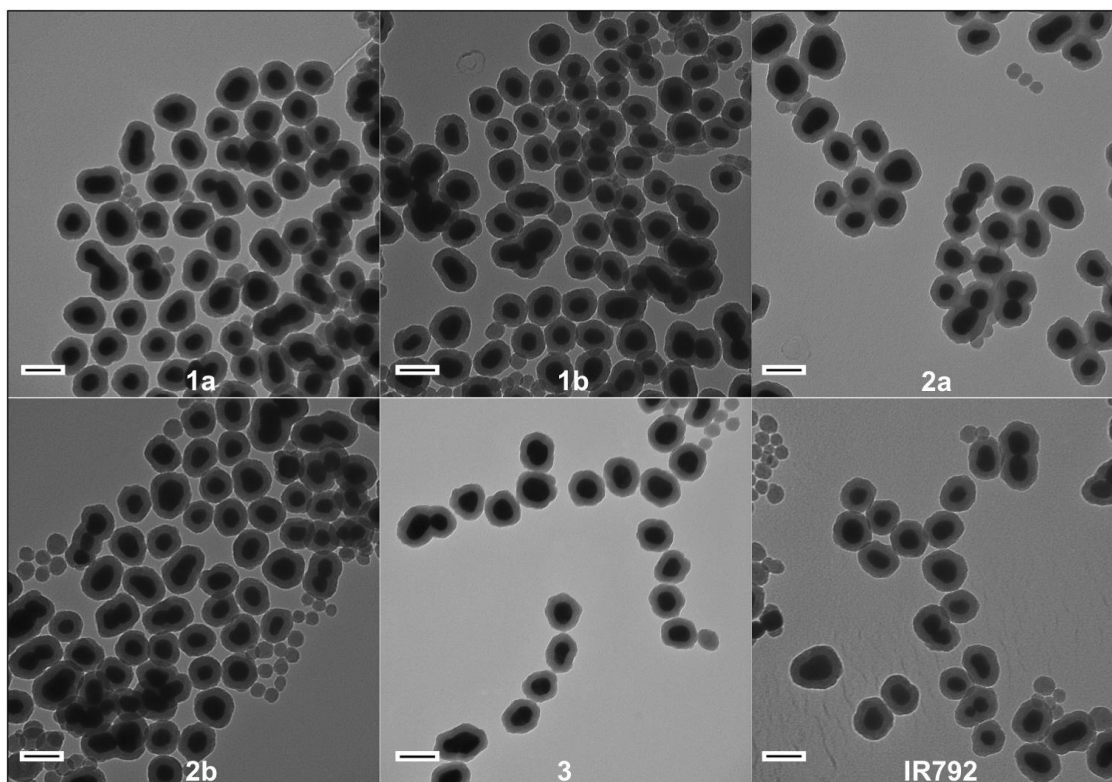

**Supplementary Figure 2. Effect of increased affinity of chalcogenopyrylium dye for the gold nanoparticle surface on colloidal stability.** Transmission Electron Micrographs of chalcogenopyrylium 1–3-based SERRS-nanoprobes (Scale bar: 100 nm).

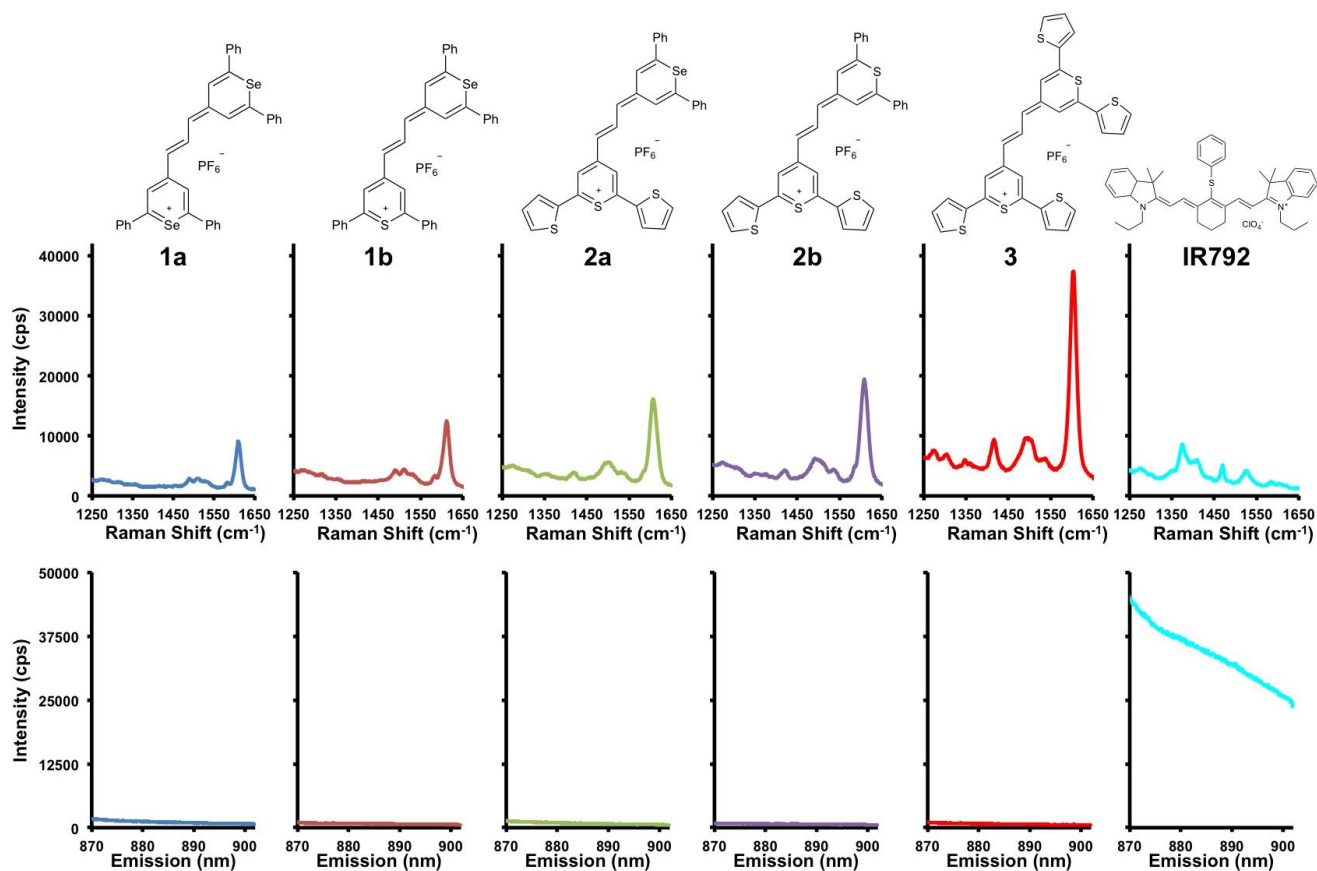

**Supplementary Figure 3. Evaluation of fluorescence interference by the chalcogenopyrylium dyes and the cyanine-based dye IR792.** Equimolar amounts of **IR792** or CP dyes **1–3** (Ph, phenyl) were incorporated in silica with a 60 nm gold nanocore (upper panel) and without a gold nanocore (lower panel) via a similar synthesis protocol (water was added instead of the gold nanoparticles for the latter. Reaction time was tripled). The SERRS- and fluorescence signal of each dye were measured under identical conditions (785 nm excitation laser wavelength, 50  $\mu$ W, 1.0 s acquisition time, 5 $\times$  objective). The SERRS spectra have not been baseline corrected.

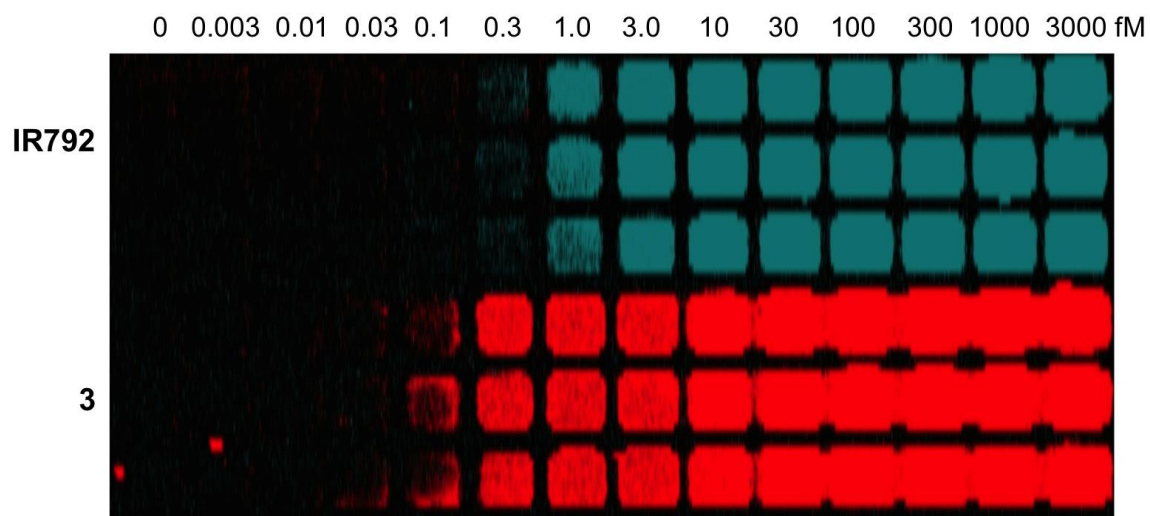

**Supplementary Figure 4. Limit of detection of IR792- or 3-based SERRS-nanoprobes.**

SERRS imaging to determine the limit of detection was performed at 100 mW (2.0 s acquisition time) on a phantom that consisted of serial diluted chalcogenopyrylium dye **3**- and **IR792**-based SERRS-nanoprobes redispersed in 10  $\mu$ L water (concentration range 3000–0.003 fM; n=3).

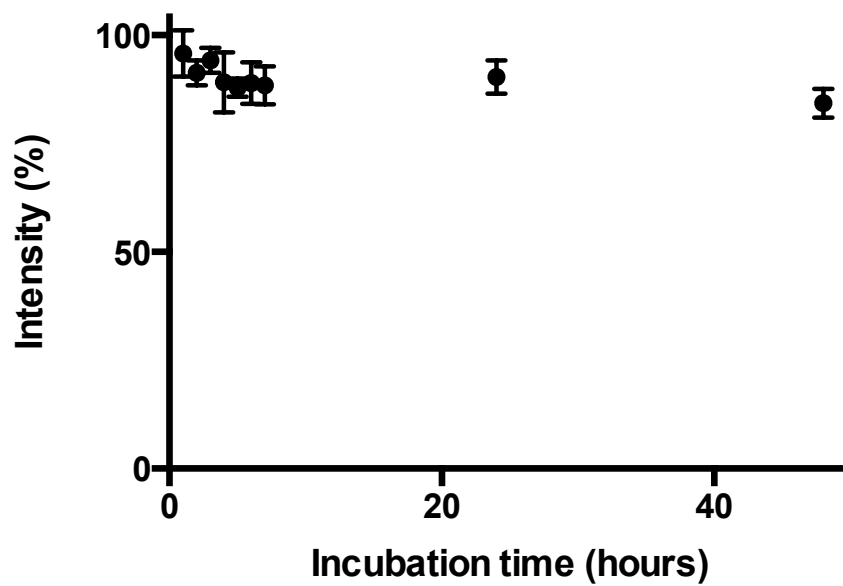

**Supplementary Figure 5. Serum stability of 3-based SERRS-nanoprobe.**

The 3-based SERRS-nanoprobe were incubated in 50% mouse serum at 37°C. At the indicated time points, a Raman spectrum was taken (50  $\mu\text{W}$ ; 1.0 s acquisition time; 5 $\times$  objective). The intensities of the 1600  $\text{cm}^{-1}$  peak were plotted (n=3; error bars represent standard deviations).

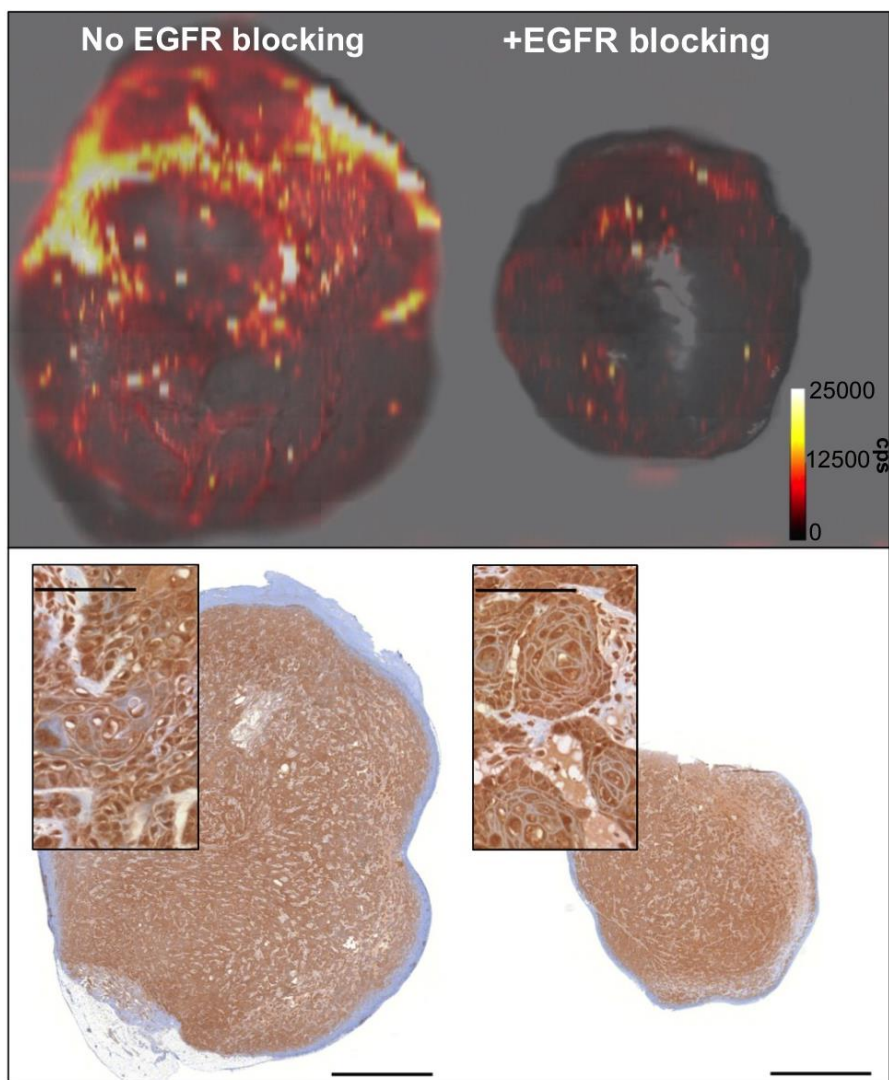

**Supplementary Figure 6. Preblocking of EGFR reduces accumulation of EGFR-targeted SERRS-nanoprobes.**

Upper panel: An excised A431 xenograft tumor of an animal that was injected with EGFR-targeted SERRS-nanoprobes (left; “No EGFR blocking”) had a significantly higher Raman signal intensity than an A431 xenograft tumor of an animal that had received a cetuximab (50pmol/g) injection 3 hours prior to injection with an equimolar amount (30 fmol/g) of the EGFR-targeted SERRS-nanoprobes (right; “+EGFR blocking”). Lower panel: Immunohistochemical staining for EGFR shows that EGFR is expressed homogenously throughout both tumors (Scale bars: 2 mm). Insets: Higher magnification of EGFR-immunostaining (Scale bars: 100  $\mu$ m). Together these results prove that the EGFR-targeted SERRS-nanoprobes target EGFR.

Supplementary Table 1. SERRS-nanoprobe characteristics.

| CP Dye    | Counterion       | Conc. of CP dye ( $\mu\text{M}$ ) | $\lambda_{\text{max}}$ ( $\text{CH}_2\text{Cl}_2$ ) | Log $\epsilon$ ( $\text{M}^{-1}\text{cm}^{-1}$ ) | Nanoparticle aggregation (850nm/540nm) | Raman Signal Intensity ( $1600\text{cm}^{-1}$ ) (cps) |
|-----------|------------------|-----------------------------------|-----------------------------------------------------|--------------------------------------------------|----------------------------------------|-------------------------------------------------------|
| <b>1a</b> | $\text{Br}^-$    | 10                                | 806                                                 | 5.36                                             | 0.27                                   | 13870 $\pm$ 599                                       |
| <b>1a</b> | $\text{Cl}^-$    | 10                                | 806                                                 | 5.36                                             | 0.61*                                  | 7346 $\pm$ 1085*                                      |
| <b>1a</b> | $\text{ClO}_4^-$ | 10                                | 806                                                 | 5.40                                             | 0.30                                   | 12685 $\pm$ 614                                       |
| <b>1a</b> | $\text{PF}_6^-$  | 10                                | 806                                                 | 5.40                                             | 0.28                                   | 14009 $\pm$ 756                                       |
| <b>1a</b> | $\text{PF}_6^-$  | 1.0                               | 806                                                 | 5.40                                             | 0.28                                   | 7101 $\pm$ 611                                        |
| <b>1b</b> | $\text{PF}_6^-$  | 1.0                               | 784                                                 | 5.30                                             | 0.31                                   | 9445 $\pm$ 389                                        |
| <b>2a</b> | $\text{PF}_6^-$  | 1.0                               | 810                                                 | 5.40                                             | 0.28                                   | 15002 $\pm$ 772                                       |
| <b>2b</b> | $\text{PF}_6^-$  | 1.0                               | 789                                                 | 5.34                                             | 0.28                                   | 19634 $\pm$ 248                                       |
| <b>3</b>  | $\text{PF}_6^-$  | 1.0                               | 813                                                 | 5.45                                             | 0.35                                   | 37680 $\pm$ 1599                                      |

\* $P < 0.05$  (significant aggregation and SERRS-signal decrease; an unpaired Student's  $t$ -test was performed).

## **Supplementary Methods**

### *SERRS-nanoprobe serum stability*

The SERRS-nanoprobes (2.0 nM) were incubated in triplicate in 50% mouse serum (Abd Serotec, Raleigh, NC) at 37 °C. At the indicated time points, a Raman spectrum was taken (50 μW; 1.0 s acquisition time; 5× objective). The intensities of the 1600 cm<sup>-1</sup> were plotted in GraphPad Prism (GraphPad Software Inc., La Jolla, CA).

### *Immunohistochemical staining*

The tissues from the imaging studies were collected and fixed in 4% paraformaldehyde, 4 °C overnight and subsequently processed to be embedded in paraffin. The Discovery XT biomarker platform (Ventana, Tucson, AZ) was used to stain the tissue sections (5 μm). Heat-induced epitope retrieval was performed using the citrate buffer (pH 6.0). The primary anti-EGFR antibody (D38B1, Cell Signaling Technology, Danvers, MA) was diluted 1:150. The biotin-labeled secondary anti-rabbit antibody (BA-1000, Vector Laboratories) was diluted 1:300.
